# Supplementary material for: Acoustofluidic cell micro-dispenser for single cell trajectory control
Source: Royal Society of Chemistry journal article supplement (doi:10.1039/d2lc00216g), 2022-01-01
Supplement: d2lc00216g1.pdf [file d2lc00216g1.pdf]

## Acoustofluidic Micro-Pipette for single cell Trajectory Control: Supplementary Information (SI)

Cynthia Richard,<sup>a,b</sup> Citsabehsan Devendran,<sup>a</sup> Dariush Ashtiani,<sup>a</sup> Victor J. Cadarso,<sup>b,c\*</sup> Adrian Neild<sup>a\*</sup>

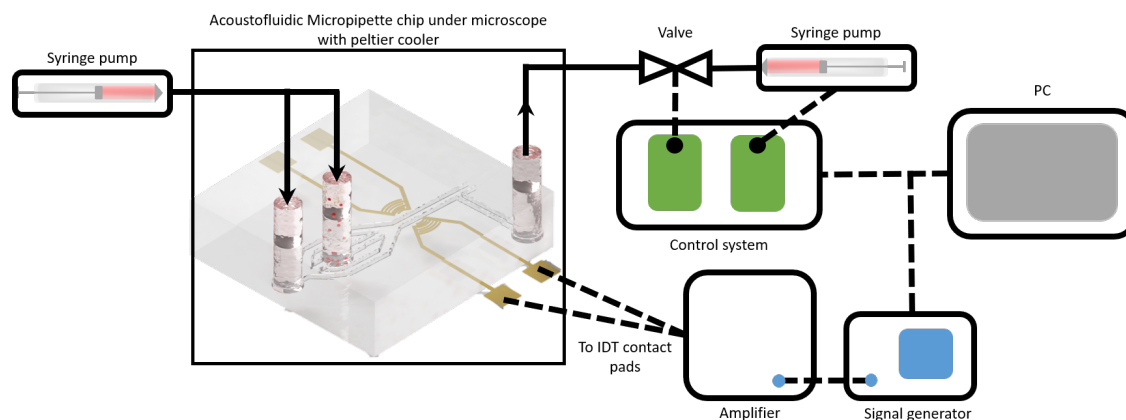

**Fig. S1** Schematic diagram depicting the components external to the acoustofluidic micropipette chip. A control system is used to trigger the FIDT actuation, the extraction syringe pump and the corresponding valve.

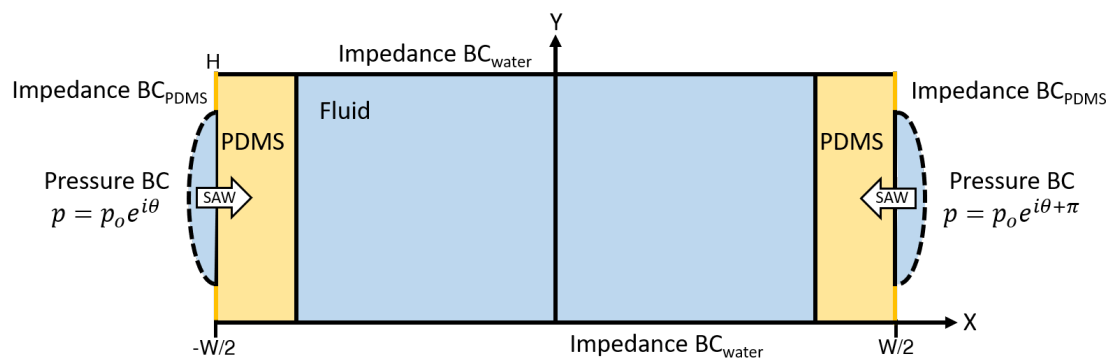

**Fig. S2** Schematic of the computational domain with the relevant boundary conditions.

<sup>a</sup> Laboratory for Micro Systems, Department of Mechanical and Aerospace Engineering, Monash University, Clayton, VIC 3800, Australia. Email: adrian.neild@monash.edu

<sup>b</sup> Applied Micro- and Nanotechnology Laboratory, Department of Mechanical and Aerospace Engineering, Monash University, Clayton, VIC 3800, Australia

<sup>c</sup> Centre to Impact Antimicrobial Resistance, Monash University, Clayton, VIC 3800 Australia

† ESI Supplementary Information.

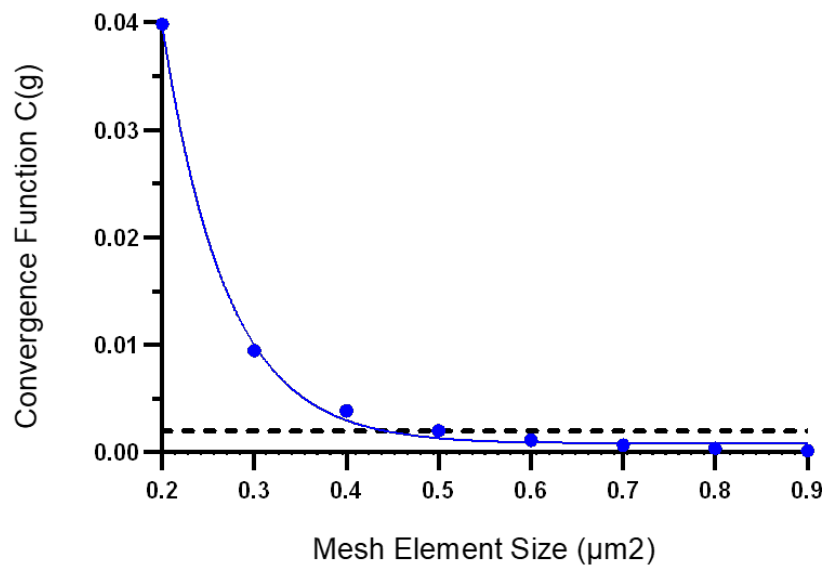

**Fig. S3** Mesh convergence analysis carried out to satisfy the convergence  $C(g) = 0.002$  (depicted by the dashed black line). A maximum mesh size of  $0.5 \mu\text{m}$  is required here, a mesh size of  $0.6 \mu\text{m}$  was used.

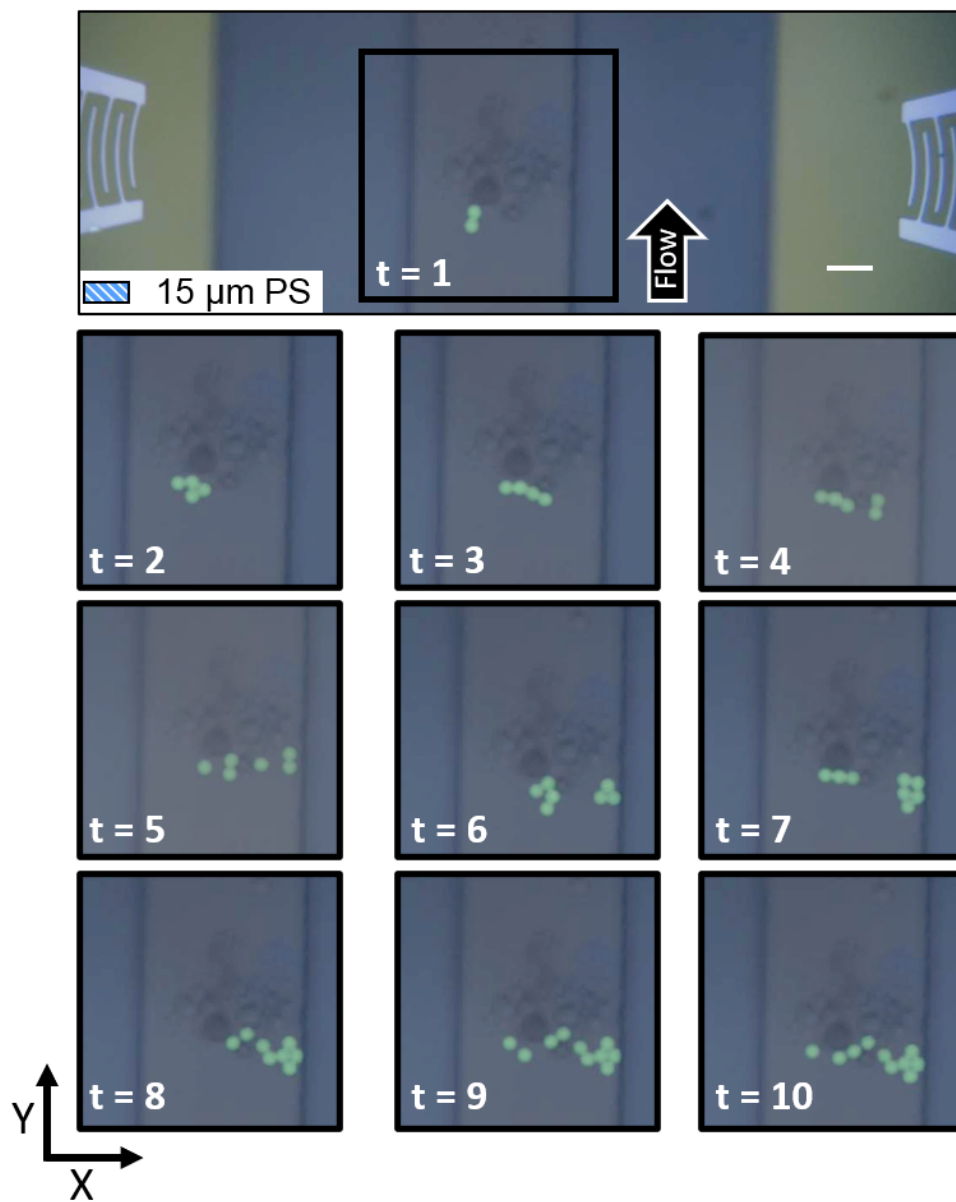

**Fig. S4** Time-lapsed images of 15  $\mu\text{m}$  particles approaching and becoming trapped, within the trapping region with the optimum flow rates of  $1 \mu\text{l min}^{-1}$  for the particles and  $2 \mu\text{l min}^{-1}$  for the sheath flow at the optimum power of 70 mW. The scale bar is 50  $\mu\text{m}$ .

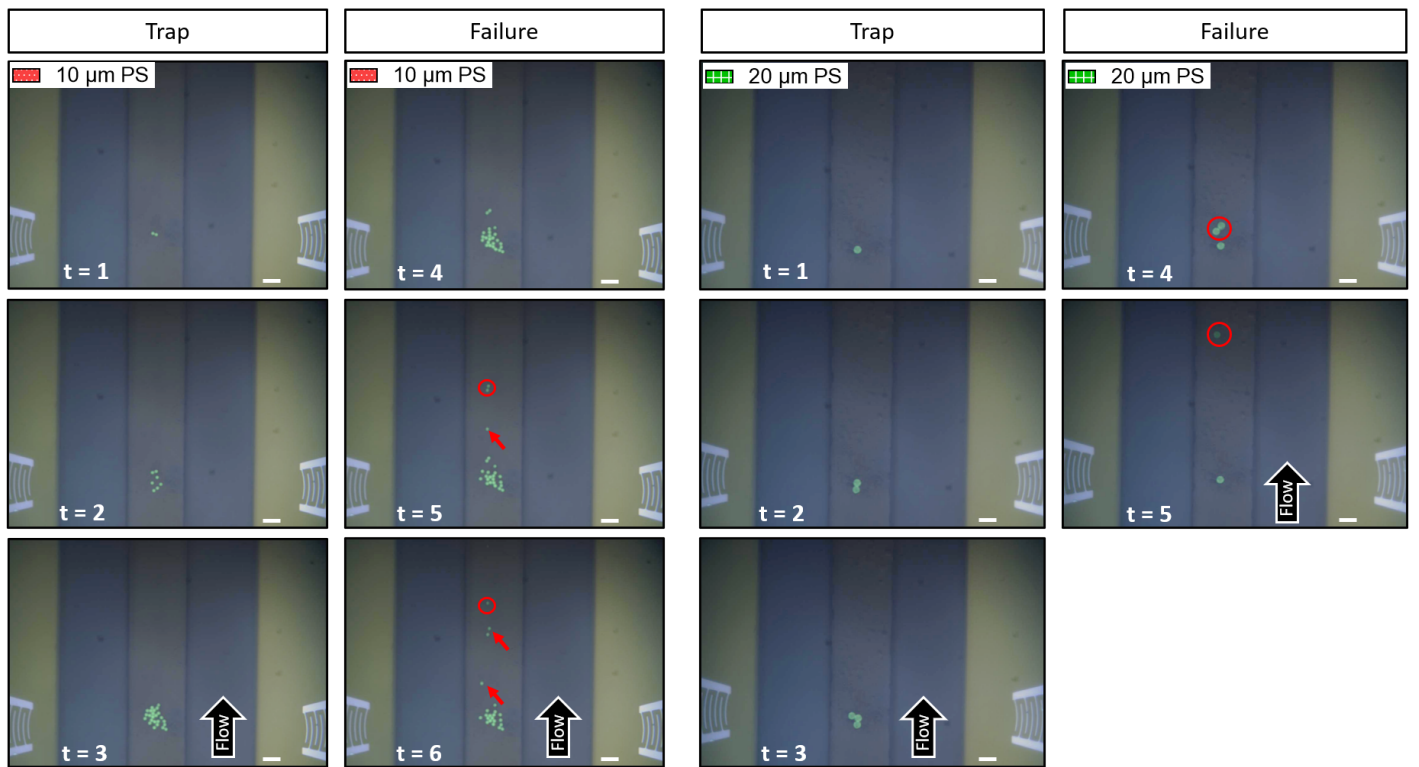

**Fig. S5** Time-lapsed images of particle cluster formation and unwanted release (failure) at a low applied power of 10 mW for 10 μm and 20 μm particles. Constant flow rates of 1 μl min<sup>-1</sup> for the particles and 2 μl min<sup>-1</sup> for the sheath flow were applied. The scale bar is 50 μm.
